# Supplementary material for: Reversibility and Low Commitment to Forward Catalysis in the Conjugation of Lipid Alkenals by Glutathione Transferase A4-4
Source: MDPI journal article supplement (doi:10.3390/biom13020329), 2023-02-09
Supplement: s1 [file s1]

## SUPPORTING INFORMATION

### Reversibility and Low Commitment to Forward Catalysis in the Conjugation of Lipid Alkenals by Glutathione Transferase A4-4

Michele Scian <sup>†</sup> Lorela Paço <sup>†</sup>, Taylor A. Murphree, Laura M. Shireman and William M. Atkins <sup>\*</sup>

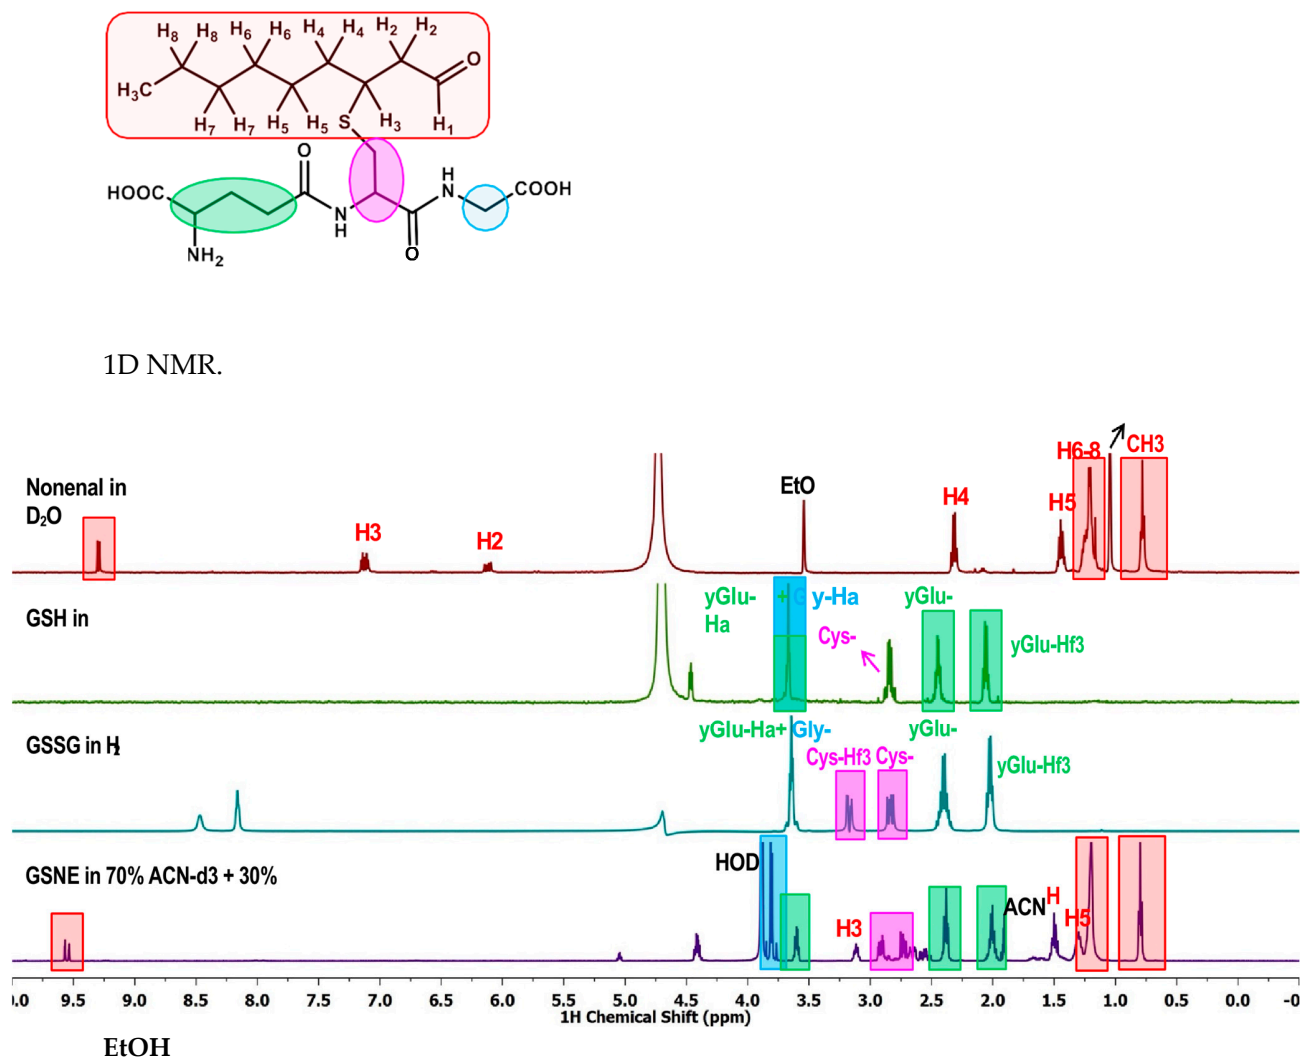

**Figure S1.** <sup>1</sup>H-NMR Spectra for NE, GSH, GSSG and GS-NE. Spectra are shown top to bottom and peaks are color coded according to the scheme shown for the molecular structure of GS-NE. The black arrow above the top spectrum at ~1 ppm is from residual EtOH.

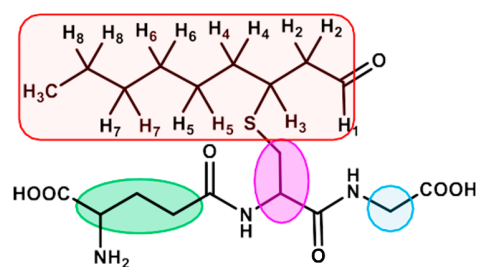

**NMR assignment:**

2D-COSY.

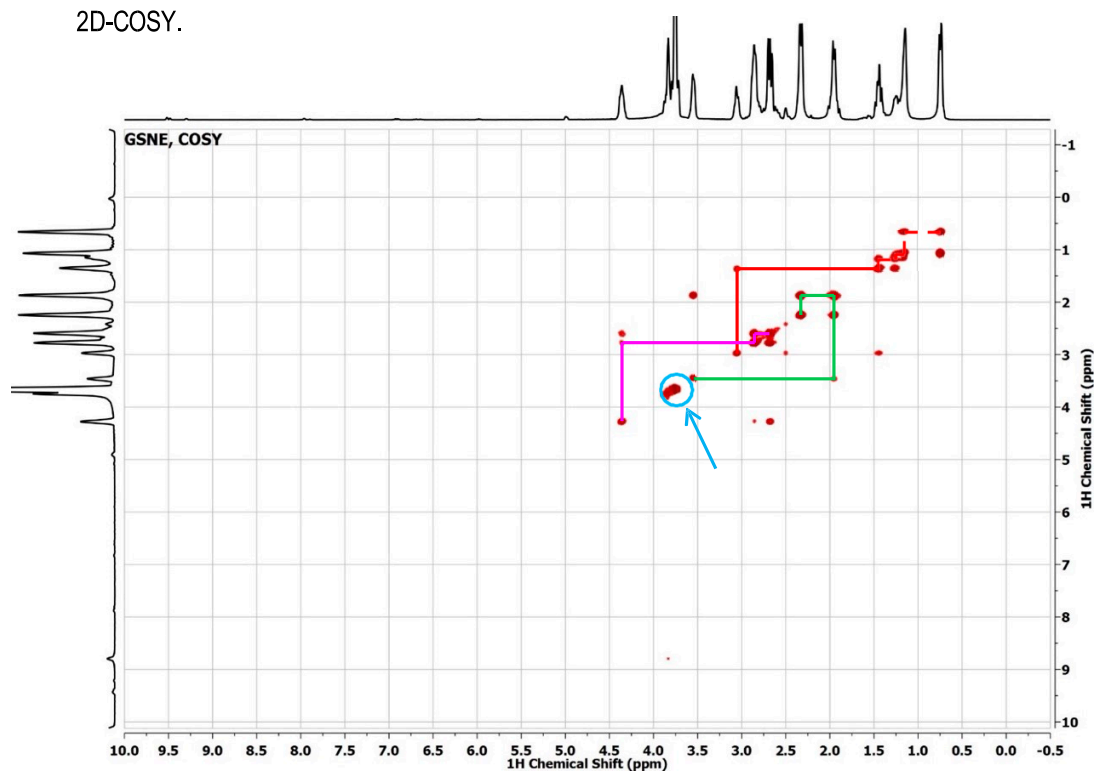

**Figure S2.** 2D COSY Spectrum of synthetic GS-NE.

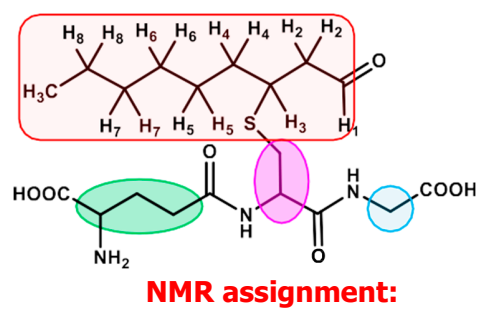

2D-TOCSY.

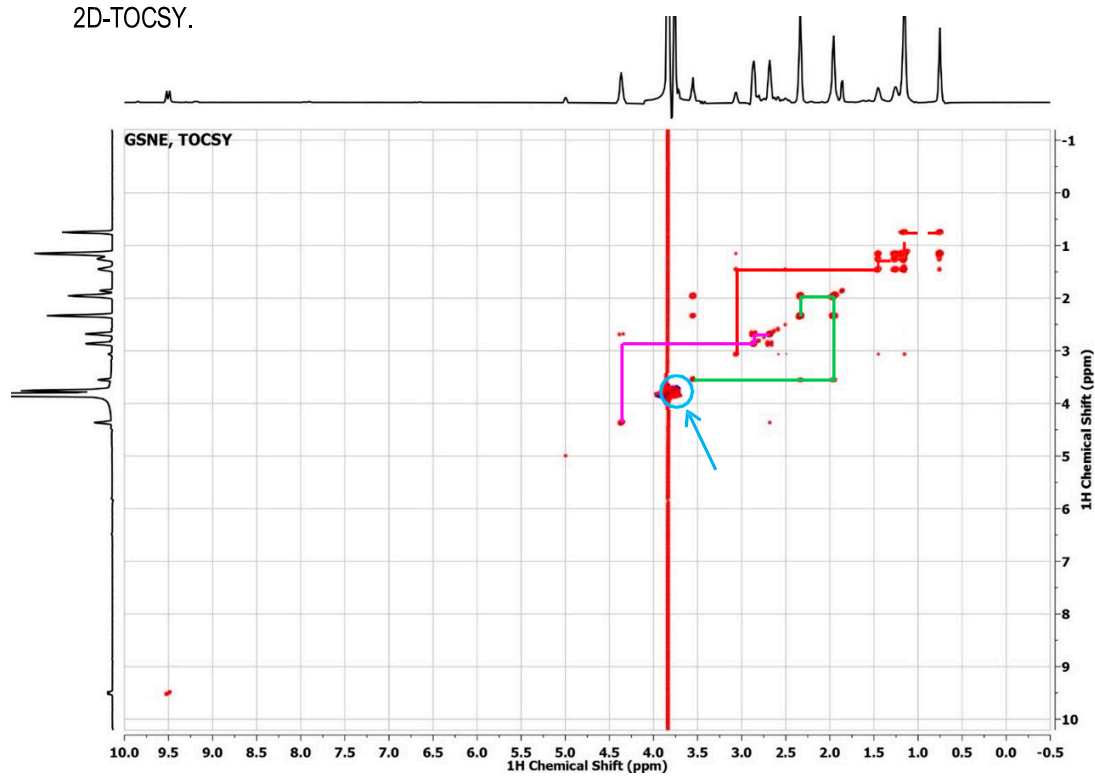

**Figure S3.** 2D TOCSY spectrum of synthetic GS-NE.

## GSNE

- MS spectrum: Target average mass = 447.56 Da

- Direct infusion (Waters SYNAPT G1).

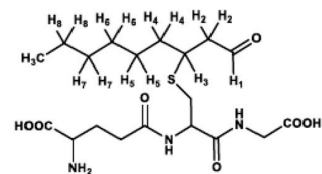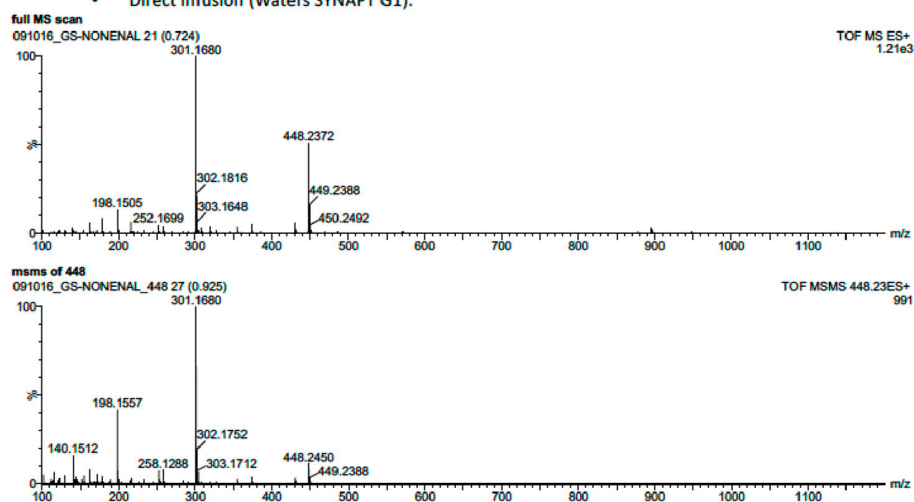

**Figure S4.** Full scan (top) and MS-MS spectra of synthetic GS-NE.

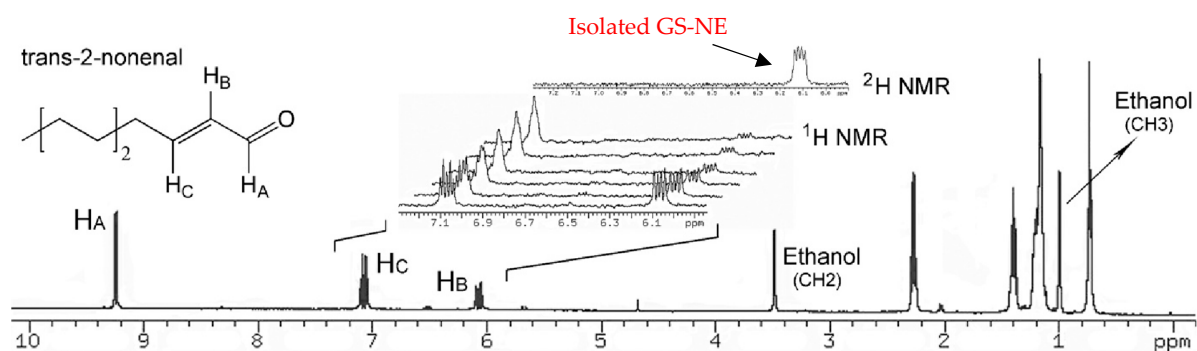

**Figure S5.** Demonstration that deuterium ( $^2\text{H}$ ) is exchanged specifically at C2 of NE. The proton NMR assignment is shown where H<sub>A</sub>, H<sub>B</sub>, and H<sub>C</sub>, correspond to H1, H2, H3, respectively, which show the changes in coupling or intensity described in the main text during incubation in D<sub>2</sub>O with GSTA4 and GSH. The NE was isolated and analyzed by  $^2\text{H}$ -NMR. The proton at C2 is specifically converted to a deuterium,  $^2\text{H}$ , as shown in the inset deuterium spectrum above the proton spectrum.

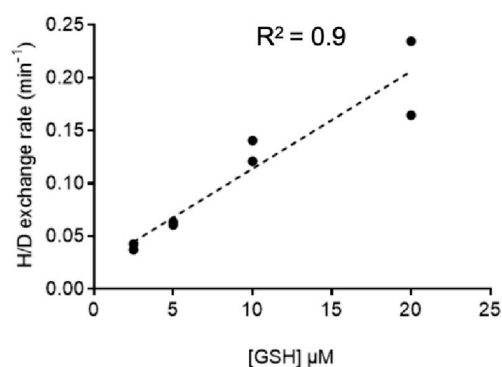

**Figure S6.** H/D exchange of NE requires GSH. The rate of H/D exchange was determined at 25 C by fitting the integrated peak area for H1 of NE at varying times, for each [GSH] shown. The data are fit to a line for visualization. The concentration range of [GSH] is sufficiently below the  $K_{M,GSH}$  that the concentration dependence approximates a line. hGSTA4-4 was 10 nM with 100 mM deuterated NaPi buffer at  $pH^* = 6.66$  (purged with Argon for 1 min). To appropriate amounts of these solutions, freshly made L-Glutathione ( $\geq 98\%$ , Sigma-Aldrich, St. Louis, MO) solutions were added (reduced GSH in 100 mM deuterated NaPi,  $pH^* = 6.66$ , purged with Argon for 1 min) to a final enzyme concentration of 0.1 mM and [GSH] = 1.5, 2.5, 5.0, 10 mM (in 600 mL total). Lastly, NE (27.5 mM stock solution in ethanol- $d_6$ ) to a final concentration 275 mM was added, immediately before starting the NMR experiment. The cosolvent concentration in each of the NMR samples was kept to 1% *v/v*.
